# Supplementary material for: Ruthenium(II) Complexes Coupled by Erianin via a Flexible Carbon Chain as a Potential Stabilizer of c-myc G-Quadruplex DNA
Source: MDPI journal article supplement (doi:10.3390/molecules28041529), 2023-02-04
Supplement: s1 [file s1]

# **Supporting information for Ruthenium(II) Complexes Coupled by Erianin Via a Flexible Carbon Chain as a Potential Stabilizer of *c-myc* G-Quadruplex DNA**

**Zhixiang Wang <sup>1</sup>, Wentao Liu <sup>1</sup>, Guohu Li <sup>1</sup>, Jiacheng Wang <sup>1</sup>, Bin Zhao <sup>\*,2</sup>, Peishan Huang <sup>1</sup>, and Wenjie Mei <sup>\*,1,3</sup>**

<sup>1</sup> School of Pharmacy, Guangdong Pharmaceutical University, Guangzhou 510006, China

<sup>2</sup> Department of Southern Pharmacy, Guangdong Jiangmen Chinese Medical, Jiangmen, 510047, China

<sup>3</sup> Guangdong Province Engineering Technology Centre for Molecular Probe and Bio-Medical Imaging, Guangzhou, 510006, China

\* Correspondence: wenjiemei@126.com (W.M.); zhaobin3226794@163.com (B.Z.)

# Table of Contents

|                                       |       |
|---------------------------------------|-------|
| 1. Additional Table and Figures       | S3    |
| 2. MS and NMR Spectra (Figure S2-S13) | S4-S9 |

## 2. Additional Table and Figures

| Complex   | $\lambda_{\text{ex}}(\text{nm})$ | $\lambda_{\text{em}}(\text{nm})$ | Stoke shift <sup>c</sup> | $\Phi_{\text{f}}$ |
|-----------|----------------------------------|----------------------------------|--------------------------|-------------------|
| <b>1b</b> | 466                              | 590                              | 124                      | 0.2294            |
| <b>2b</b> | 466                              | 590                              | 124                      | 0.2966            |
| <b>1</b>  | 466                              | 590                              | 124                      | 0.2866            |
| <b>2</b>  | 466                              | 590                              | 124                      | 0.3109            |

**Table S1:** The spectroscopic properties of the ruthenium(II) complexes.

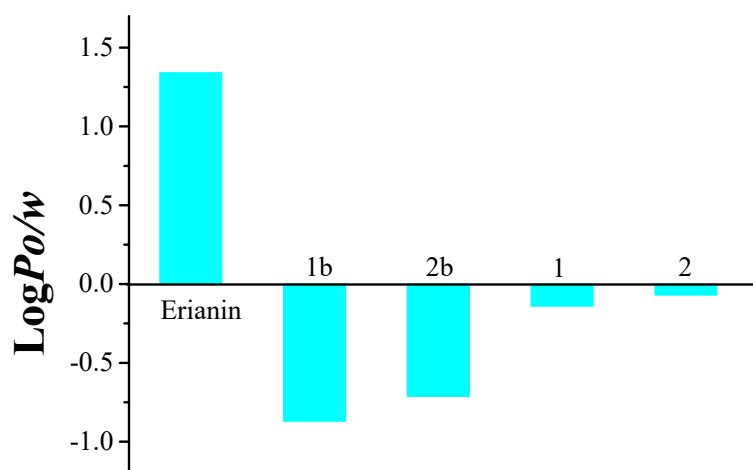

**Figure S1:** Octanol/water partition coefficients of ruthenium(II) complexes.

### 3. MS and NMR Spectra

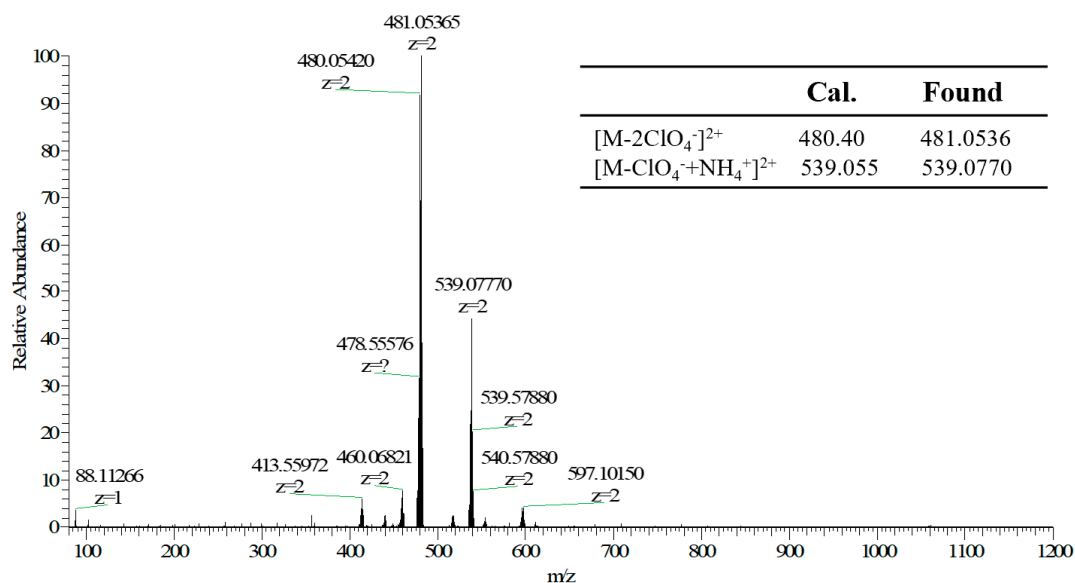

Figure S2: ESI-MS spectrum of compound 1b.

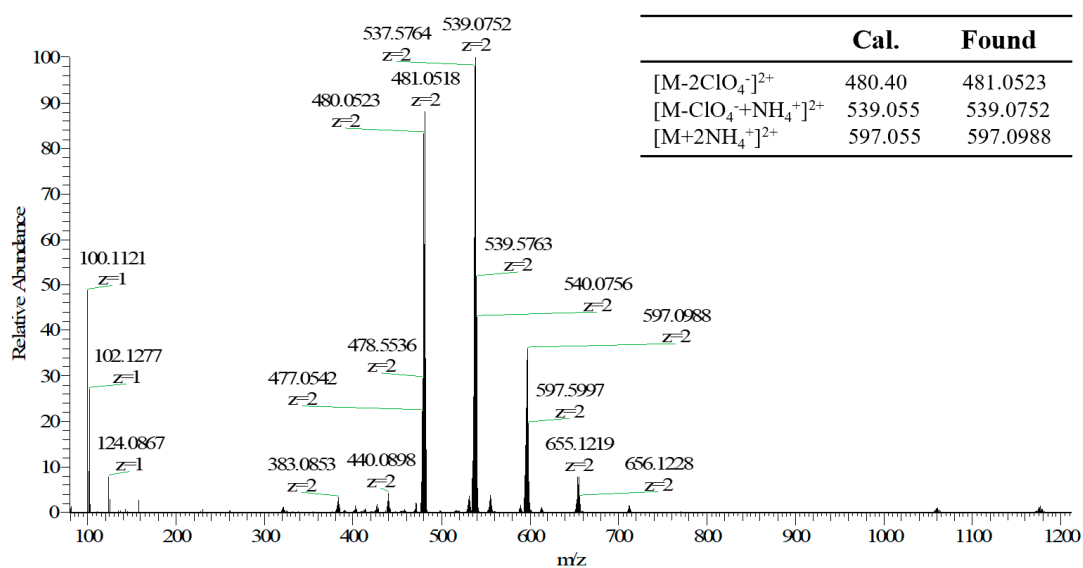

Figure S3: ESI-MS spectrum of compound 2b.

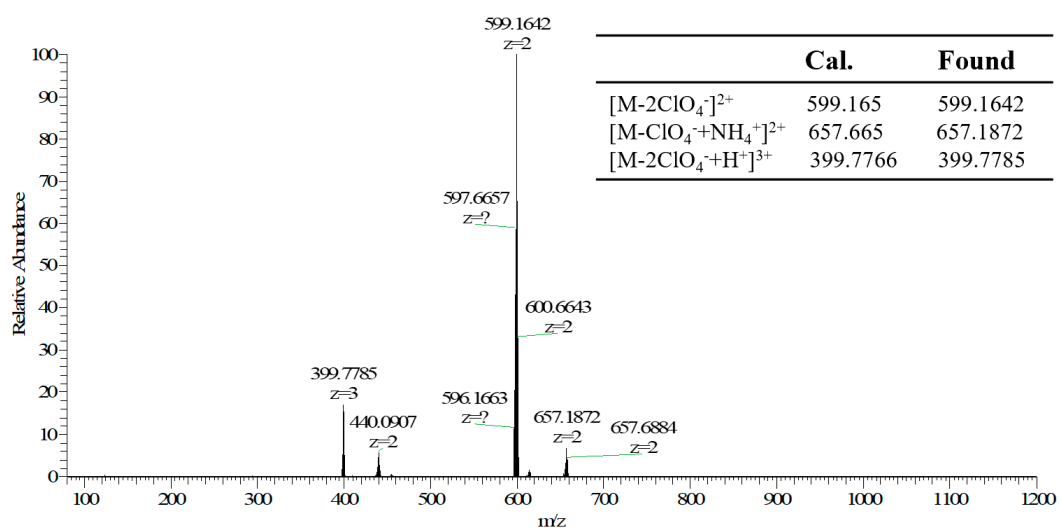

Figure S4: ESI-MS spectrum of compound 1.

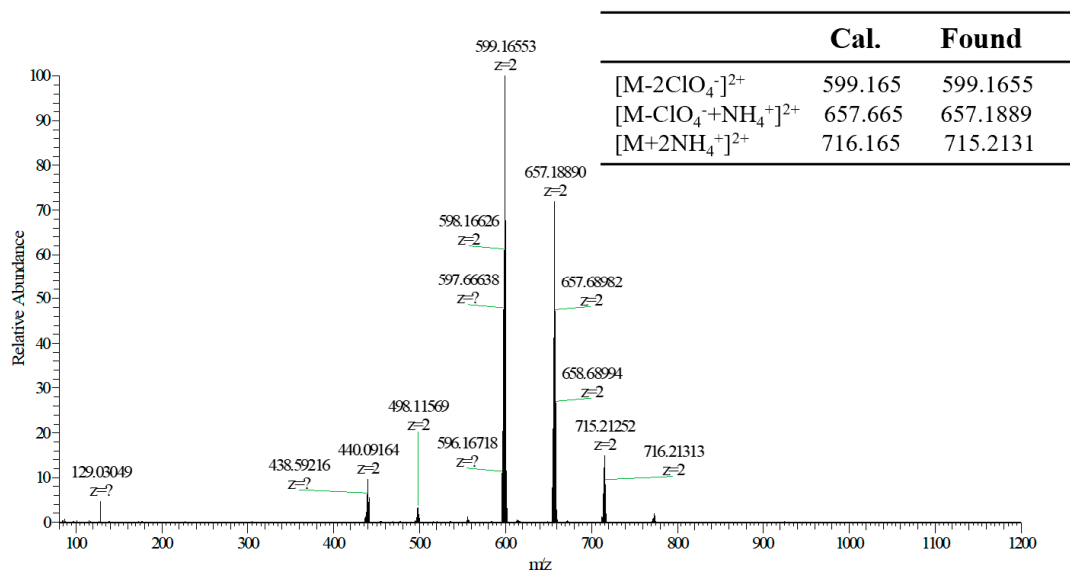

Figure S5: ESI-MS spectrum of compound 2.

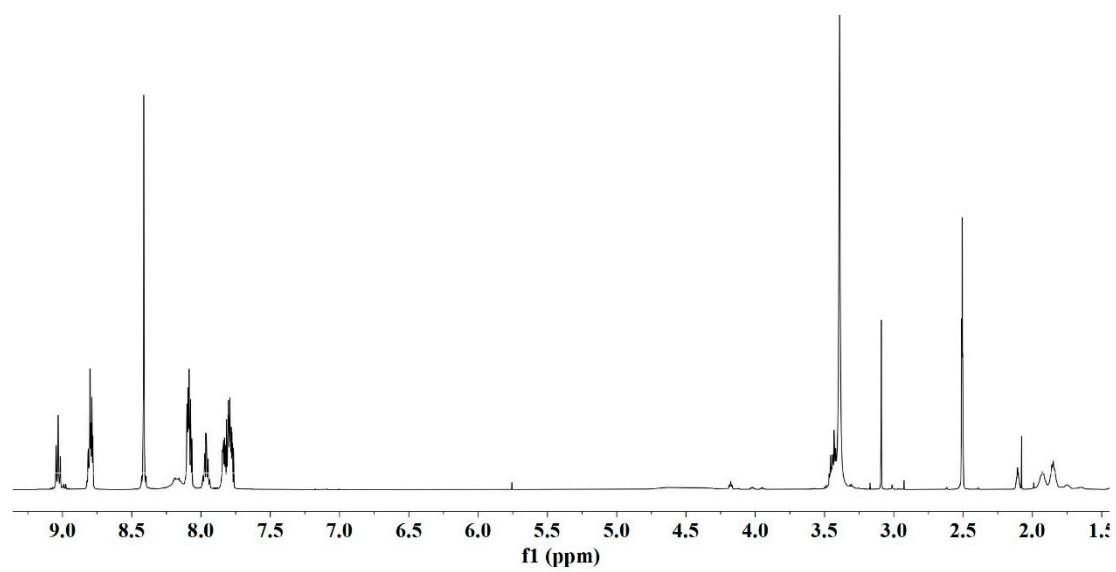

**Figure S6:**  $^1\text{H}$  NMR spectrum of compound **1b** in  $\text{DMSO-}d_6$ .

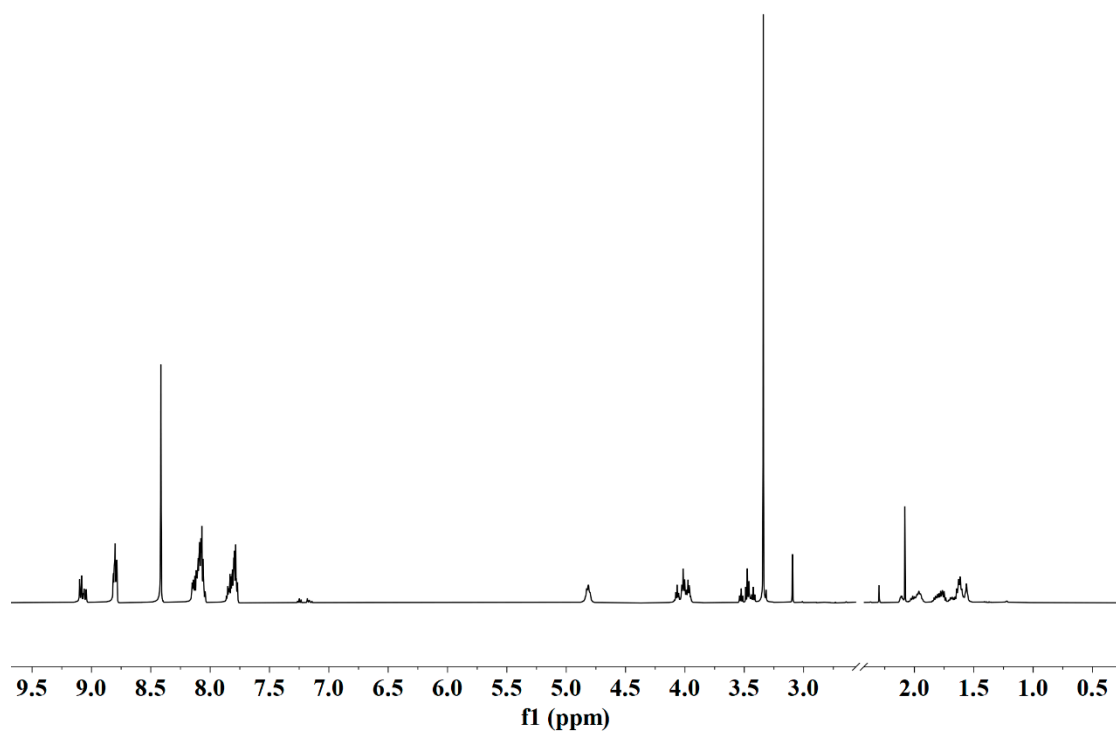

**Figure S7:**  $^1\text{H}$  NMR spectrum of compound **2b** in  $\text{DMSO-}d_6$ .

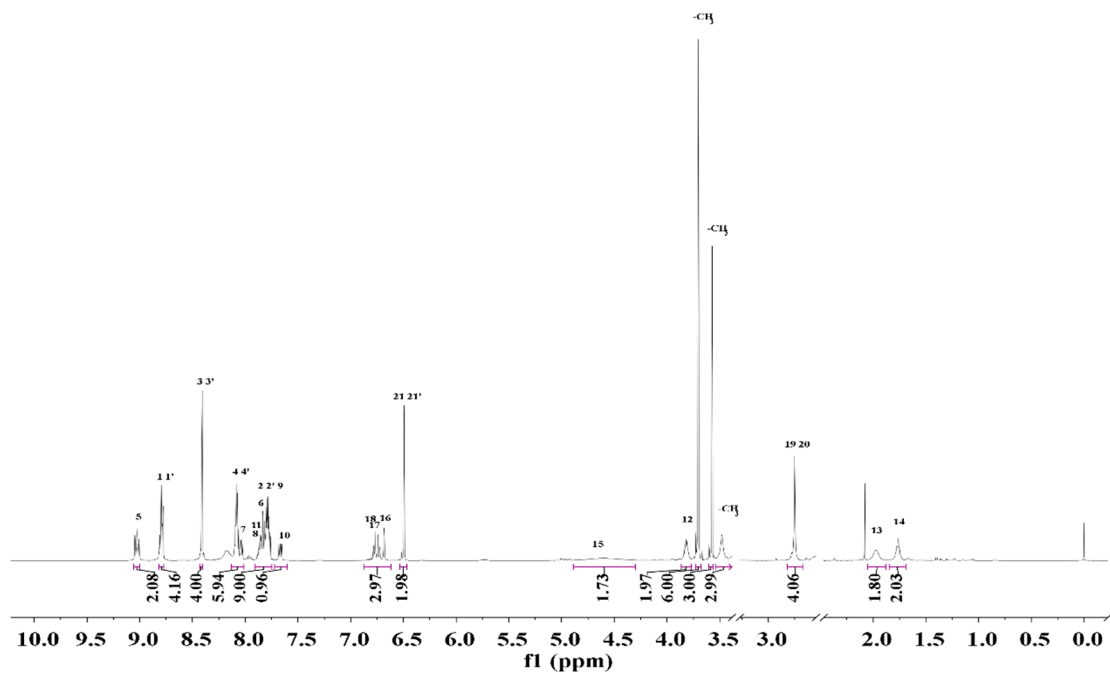

Figure S8: <sup>1</sup>H NMR spectrum of compound 1 in DMSO-*d*<sub>6</sub>.

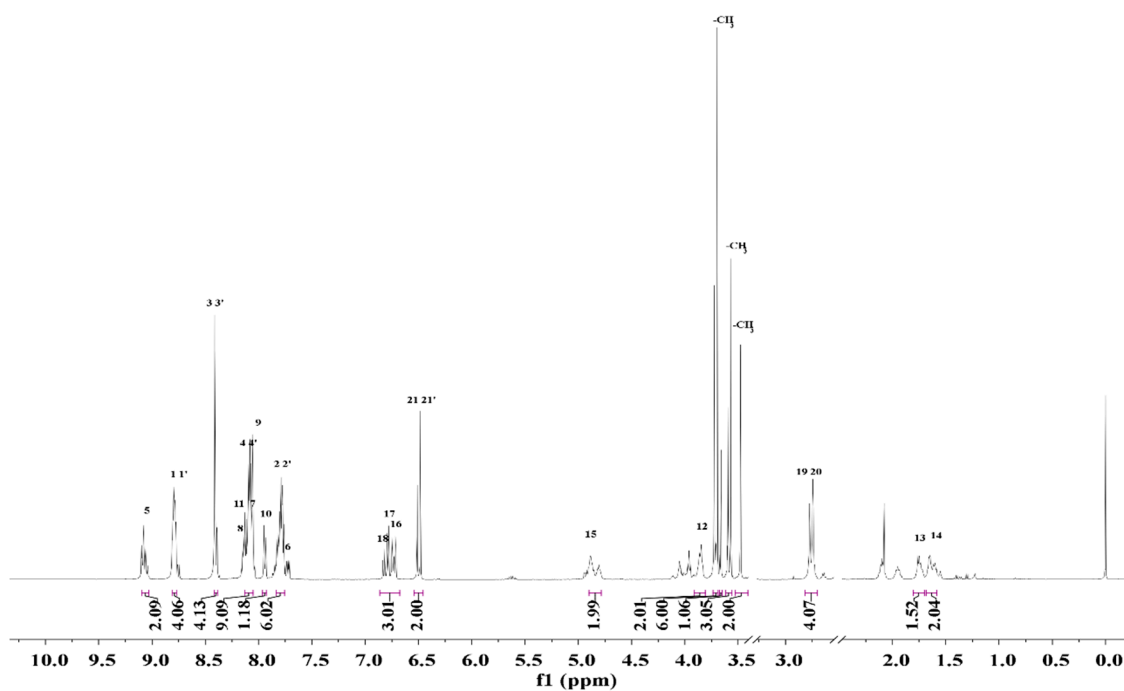

Figure S9: <sup>1</sup>H NMR spectrum of compound 2 in DMSO-*d*<sub>6</sub>.

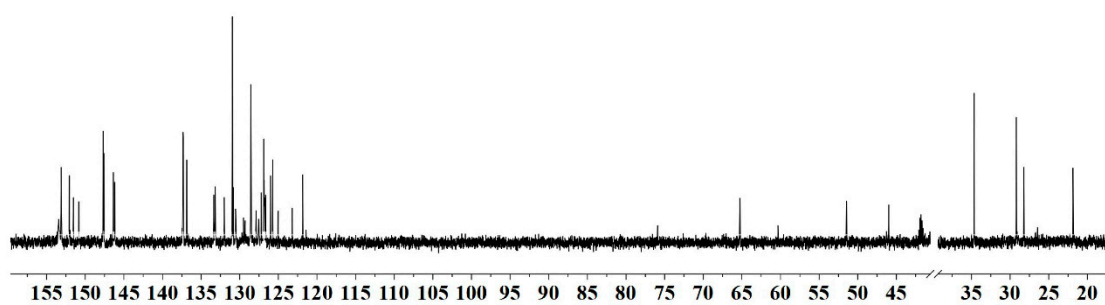

**Figure S10:**  $^{13}\text{C}$  NMR spectrum of compound **1b** in  $\text{DMSO}-d_6$ .

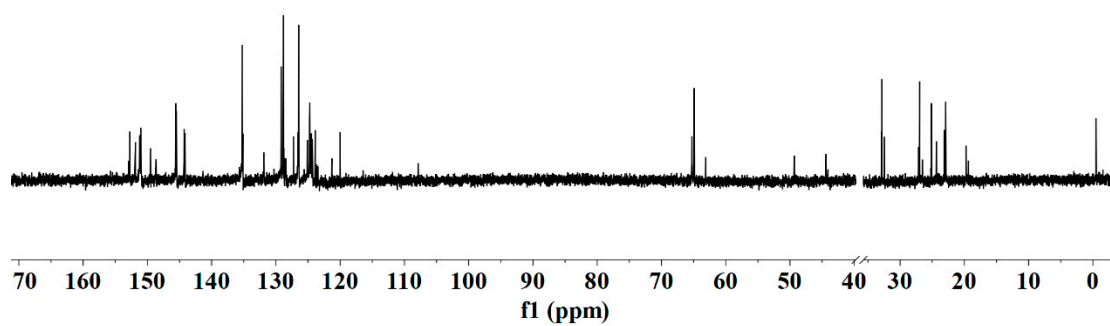

**Figure S11:**  $^{13}\text{C}$  NMR spectrum of compound **2b** in  $\text{DMSO}-d_6$ .



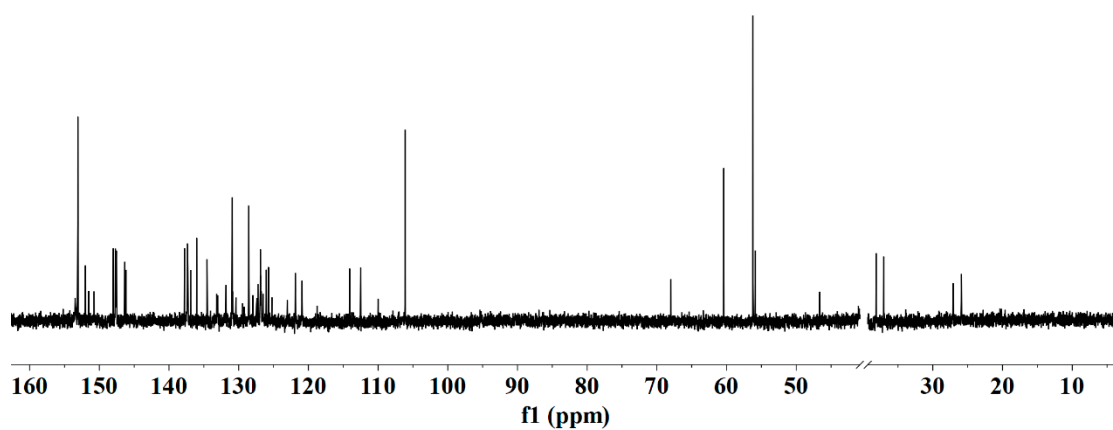

**Figure S12:**  $^{13}\text{C}$  NMR spectrum of compound **1** in  $\text{DMSO-}d_6$ .

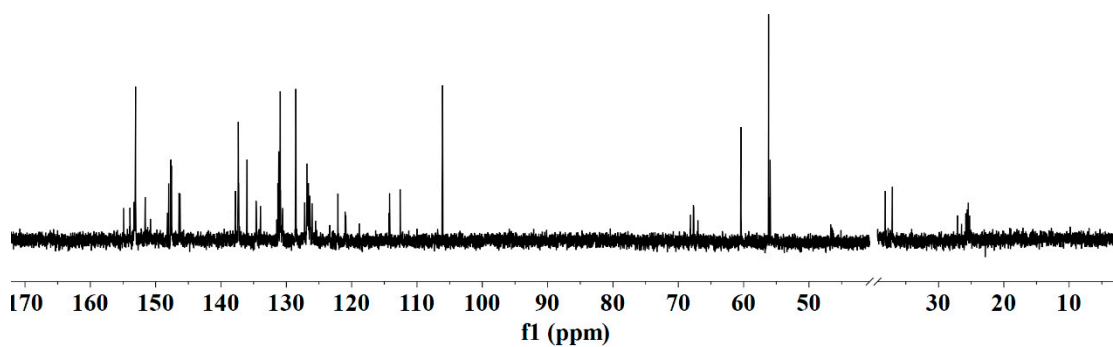

**Figure S13:**  $^{13}\text{C}$  NMR spectrum of compound **2** in  $\text{DMSO-}d_6$ .
